# Supplementary material for: Genotoxin Induced Mutagenesis in the Model PlantPhyscomitrella patens
Source: Hindawi journal article supplement (doi:10.1155/2013/535049), 2013-01-01
Supplement: f1 [file 535049.f1.pdf]

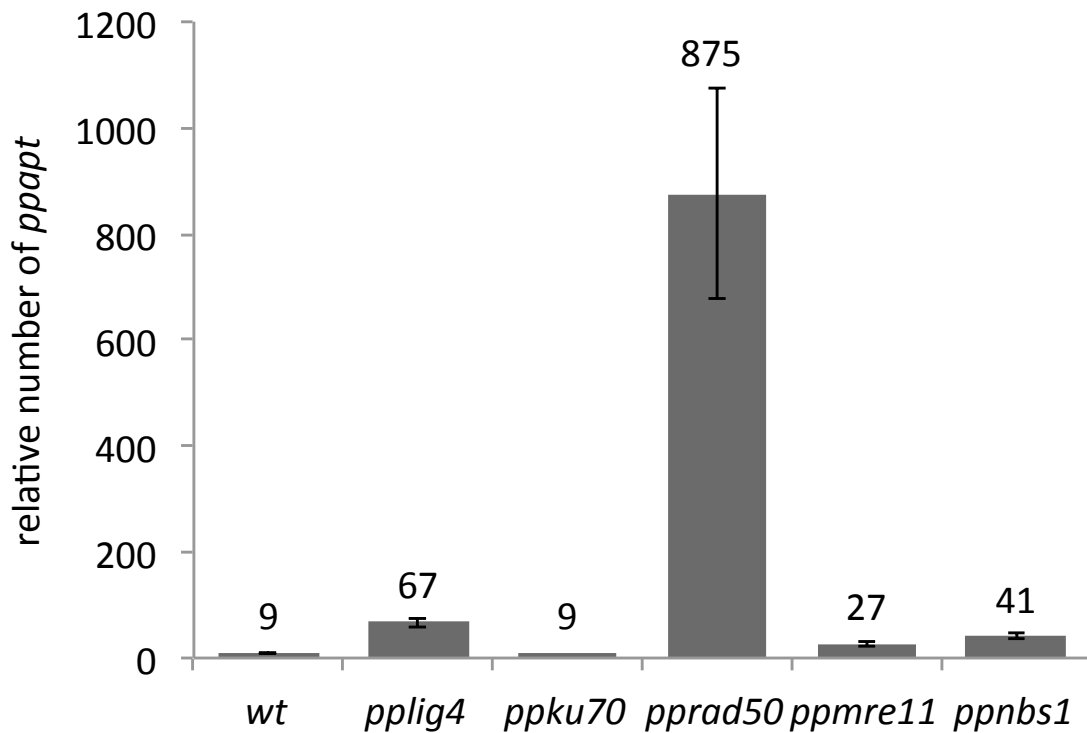

**Supplemental Figure 1** Relative numbers of 2-FA resistant clones induced in *Physcomitrella* wild type and *lig4*, *ku70*, *rad50*, *mre11* and *nbs1* mutants by 1  $\mu\text{g mL}^{-1}$  Bleomycin and normalized to 1 g dry tissue weight.

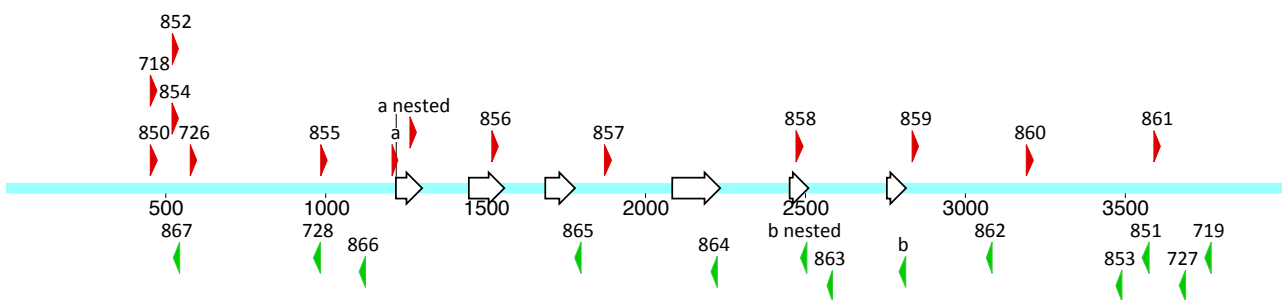

**Supplemental Figure 2** Map and localization of *APT* primers listed in Supplemental Table 1. Turquoise line represents genomic sequence DQ117987 with indicated nucleotide numbers. Empty arrows indicate position of exons and red and green arrows, forward and reverse sequencing primers.

| Primer # | Orientation | Sequence               |
|----------|-------------|------------------------|
| a        | F           | CAGGAAGTGAAGATGTCCG    |
| a nested | F           | GGACAGCATCCGTACCATTC   |
| 718      | F           | ATAAACAACGCGAGGATGAC   |
| 726      | F           | ATTCCACTCGCCGAAGGGAC   |
| 854      | F           | TTGGGTAACCGTGAATCAG    |
| 855      | F           | CAGTGCCTGTGATGCGGTTG   |
| 856      | F           | TTGAGCGTTACCGGGACCAG   |
| 857      | F           | CAATGTGACCGAGACTTCATCC |
| 858      | F           | GTGGAATGCGCGTGCTTGGTTG |
| 859      | F           | GTCGCCGTGGTCATTGGTTC   |
| 860      | F           | GCCTCCTGATGTTTCTCTTACC |
| 861      | F           | TCCACAAGGACCCAGTTACC   |
| b        | R           | GGTGGAATATGAGGGCGAGTA  |
| b nested | R           | CTTGGTTGAGCTGGTAGACC   |
| 719      | R           | CAATCCACATCCAGCCAATG   |
| 727      | R           | CCGTCGAATCTGAACCGCGA   |
| 728      | R           | GAATTTGCTGTGGGTTATGGGC |
| 851      | R           | GAATATCCTCACGTCCGAAAGC |
| 853      | R           | GATGAGAAAGGAACTGCGC    |
| 862      | R           | CTTCTAACCTCGGAAACG     |
| 863      | R           | GAGTTCAATGCCGTCTGGAG   |
| 864      | R           | CACTCTTGGAGCTGCCATCA   |
| 865      | R           | GGTAAGGGTTGACAGGCACT   |
| 866      | R           | GGTCAATGTGGCAGCAAGTA   |
| 867      | R           | GTAACCGTGGAATCAGCAAC   |

**Supplemental Table 1** Primers used for sequencing *APT* locus.

| mutant line |              | INTRONS/NON CODING                        |                                           |                 |              |              | EXONS                                                                                                 |                    |                 |              |              |
|-------------|--------------|-------------------------------------------|-------------------------------------------|-----------------|--------------|--------------|-------------------------------------------------------------------------------------------------------|--------------------|-----------------|--------------|--------------|
|             | apt mutant # | substitution                              | point insertions                          | point detetions | insertions>2 | deletions >2 | substitution                                                                                          | point insertions   | point detetions | insertions>2 | deletions >2 |
| wt          | 1            | T-->A(1436)                               |                                           | A(1168)         |              |              |                                                                                                       |                    |                 |              |              |
|             | 2            | T-->A(2173)<br>G-->T(2200)<br>T-->A(2361) |                                           | T(1800)         | GCTT(2400)   |              |                                                                                                       | G(1650)<br>T(1910) |                 |              |              |
|             | 3            |                                           |                                           |                 |              |              |                                                                                                       |                    |                 |              | 1364:1372    |
|             | 5            |                                           |                                           |                 |              |              | T-->A(747)                                                                                            |                    |                 |              |              |
|             | 6            |                                           |                                           | C(720)          |              |              |                                                                                                       | G(752)             |                 |              |              |
|             | pplig4       | 1                                         |                                           | A(1138)         |              |              |                                                                                                       |                    |                 |              |              |
| 2           |              |                                           | T(3683)                                   |                 |              |              |                                                                                                       |                    |                 |              |              |
| 3           |              |                                           | C(1108)                                   |                 |              |              |                                                                                                       | T(1240)            |                 |              |              |
| 4           |              | T-->A(2790)                               |                                           |                 |              |              |                                                                                                       | T(790)             |                 |              |              |
| ppmre11     | 1            |                                           |                                           | G(715)          |              |              |                                                                                                       |                    | T(2619)         |              | 739:1125     |
|             | 4            |                                           |                                           | T(1847)         |              |              | G-->T(2228)                                                                                           | T(2619)            |                 |              |              |
|             | 6            | G-->T(2871)                               |                                           |                 |              |              |                                                                                                       |                    |                 |              |              |
| pprad50     | 1            |                                           |                                           |                 |              |              |                                                                                                       | T(2213)            |                 |              |              |
|             | 2            | A-->T(1734)                               |                                           | T(1823)         |              |              |                                                                                                       |                    |                 |              | 1566:1571    |
|             | 3            |                                           |                                           |                 |              |              | A-->T(1577)                                                                                           |                    |                 |              | 1582:1637    |
|             | 4            |                                           | T-->A(1543)<br>A-->T(1544)<br>G-->T(1546) |                 |              |              | A-->T(1204)<br>T-->A(1212)<br>T-->C(1407)<br>T-->A(1591)<br>T-->A(1604)<br>T-->C(1634)<br>C-->T(1869) | G(1640)            |                 |              |              |
|             | 5            |                                           |                                           |                 |              |              |                                                                                                       |                    | G(1640)         |              |              |
|             | 7            |                                           |                                           |                 |              |              |                                                                                                       | G(752)             | T(761)          |              | 1166:1914    |

**Supplemental Table 2** Mutations identified in the *APT* locus Pp1s114\_124V6.1 (<https://www.cosmoss.org>) of 2-FA resistant clones induced by Bleomycin in *Physcomitrella* wild type and *lig4*, *mre11* and *rad50* mutants.
